# Supplementary material for: Purification of silicon from waste photovoltaic cells and its value-added application in lithium-ion batteries
Source: Royal Society of Chemistry journal article supplement (doi:10.1039/d2nj01093c), 2022-01-01
Supplement: d2nj01093c1.pdf [file d2nj01093c1.pdf]

## **Supporting Material**

### **The purification of silicon from waste photovoltaic-cells and its value-added application in lithium-ion batteries**

Zhao Zhang <sup>1,2</sup>, Nina Yang<sup>1,5</sup>, Fengshuo Xi <sup>1,2</sup>, Xiuhua Chen <sup>3</sup>, Shaoyuan Li <sup>1,2,4\*</sup>, Wenhui Ma <sup>1,2\*</sup>, Yu Lei<sup>5</sup>, Rong Deng <sup>4</sup>

<sup>1</sup> Faculty of Metallurgical and Energy Engineering/State Key Laboratory of Complex Nonferrous Metal Resources Clean Utilization, Kunming University of Science and Technology, Kunming 650093, China

<sup>2</sup> Silicon Material Industry Research Institution (Innovation Center) of Yunnan Province, Kunming 650093, China

<sup>3</sup> School of Materials Science and Engineering, Yunnan University, Kunming 650091, China

<sup>4</sup> School of Photovoltaic and Renewable Energy Engineering (SPREE), University of New South Wales, Sydney, 2052, Australia

<sup>5</sup> Xi'an Mingde institute of technology, Xi'an, 710000, China

\* Corresponding Authors: [lsy4158085550@163.com](mailto:lsy4158085550@163.com) (S. Li); [mwhsilicon@126.com](mailto:mwhsilicon@126.com) (W. Ma);

## Results and Discussion

TableS1. Structural parameters of bare Si, PSi

| Sample  | Surface are( $\text{m}^2\text{g}^{-1}$ ) | Pore volume( $\text{cm}^3\text{g}^{-1}$ ) | Pore size(nm) |
|---------|------------------------------------------|-------------------------------------------|---------------|
| Bare Si | 1.778                                    | 0.008                                     | 3.806         |
| Si      | 9.198                                    | 0.069                                     | 3.796         |

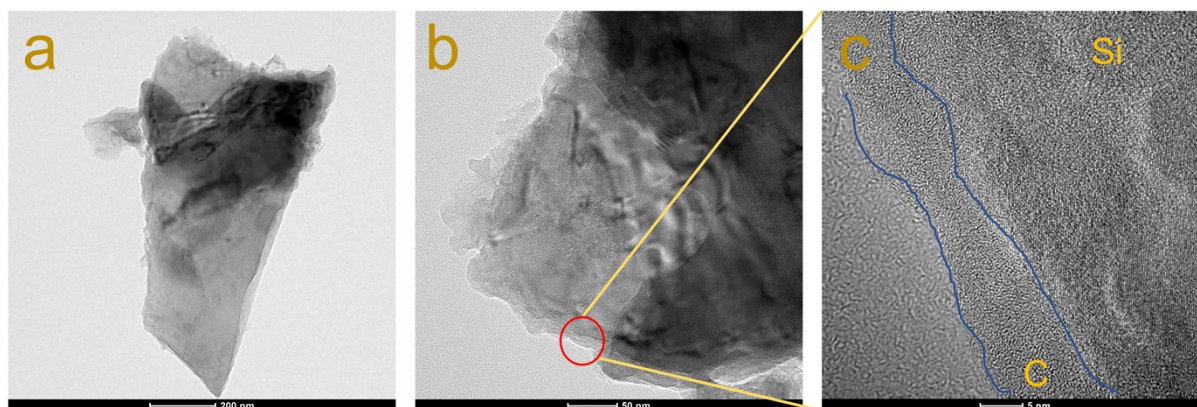

Figure S1. HRTEM images of (a,b,c) PSi/Li/N@C.

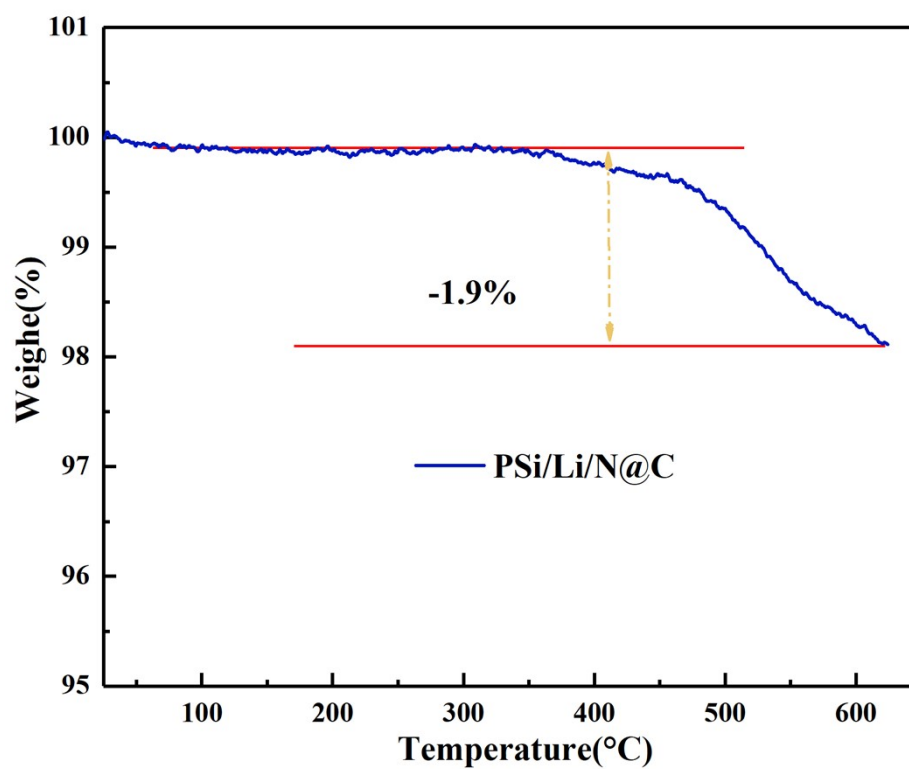

FigureS2. TGA curves of PSi/Li/N@C composite.

**Table S2.** Comparison of electrochemical performance in this work with previously published reports on waste photovoltaic cells as anode materials.

| <b>Active materials</b>  | <b>Synthesis methods</b>                                         | <b>Specific capacity<br/>(mA h g<sup>-1</sup>)</b> | <b>Cycle number</b> | <b>Current density<br/>(mA g<sup>-1</sup>)</b> | <b>References</b>                                                      |
|--------------------------|------------------------------------------------------------------|----------------------------------------------------|---------------------|------------------------------------------------|------------------------------------------------------------------------|
| <b>P-Si</b>              | Molten salt electrolysis<br>and alloying                         | ~2700                                              | 500                 | 1500                                           | Waste Management. 2021,<br>doi.org/10.1016/j.wasman.2021.08.037        |
| <b>WSNPs@C</b>           | CNTs Balling milling<br>and Dopamine<br>Hydrochloride            | ~1200                                              | 50                  | 800                                            | SSRN, 2020,<br>doi.org/10.2139/ssrn.n.3751571                          |
| <b>The ultra-pure Si</b> | Planetary Ball Milling                                           | ~2000                                              | 50                  | 1500                                           | ACS Sustainable Chem. Eng. 2020,<br>DOI: 10.1021/acssuschemeng.9b07434 |
| <b>PSi/Li/N@C</b>        | <b>Metal-assisted<br/>chemical etching and<br/>carbon-coated</b> | <b>1400</b>                                        | <b>120</b>          | <b>685</b>                                     | <b>Our work</b>                                                        |
